# Supplementary figures and images for: Inhibition of COX-2 Impairs Colon Cancer Liver Metastasis through Reduced Stromal Cell Reaction
Source: PubMed Central journal article supplement — Biomol Ther (Seoul). 2021 Jan 18;29(3):342–51. doi: 10.4062/biomolther.2020.160 (PMC8094073; doi:10.4062/biomolther.2020.160), 2021-01-18

## Supplemental Data

Supplementary Figure 1.

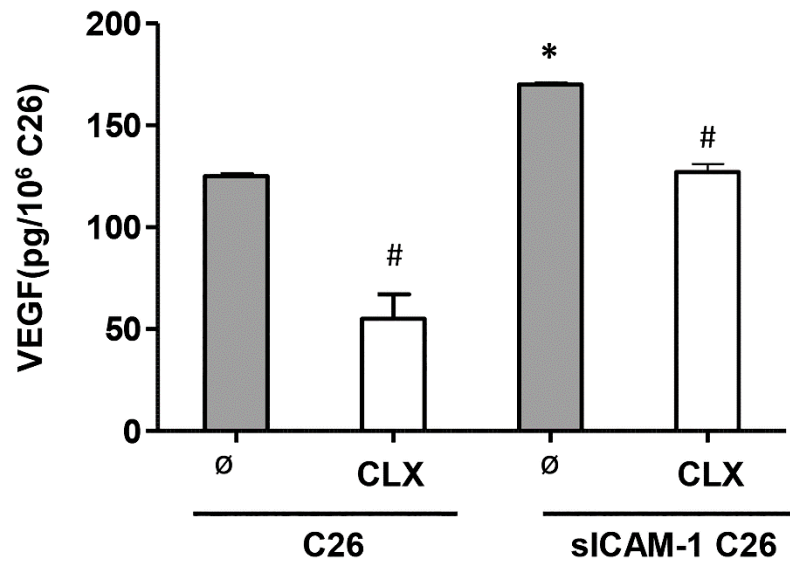

Supplementary Figure 2.

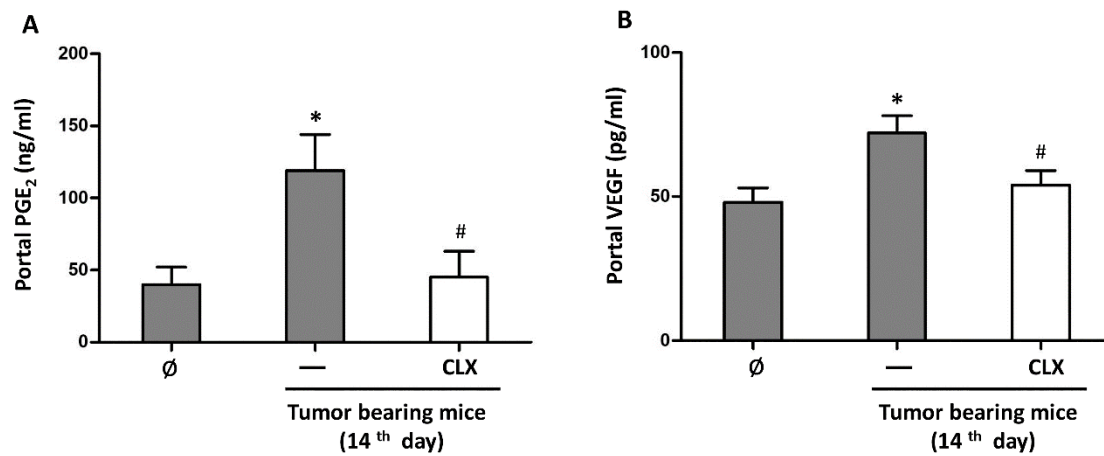

Supplement: bt-29-3-342-supple.pdf [file bt-29-3-342-supple.pdf]
